# Supplementary material for: Synthesis and properties of a dizinc complex of a novel macrocyclic ligand with two alcohol-pendants: a model for alkaline phosphatase
Source: Royal Society of Chemistry journal article supplement (doi:10.1039/b206033g), 2002-01-01
Supplement: b206033g.doc [file b206033g.doc]

**Supplement 1. W-x Tang *et al*.**

Typical titration curve for L with or without ZnCl2 at 25 C and *I* = 0.1 (NaNO3).

(a) 2.0 mM L + 12.0 mM HCl; (b) 2.0 mM L + 4.0 mM ZnCl2 + 12.0 mM HCl.

**Supplement 2. W-x Tang *et al*.**

| Species | Log** | Max(%) | pH |
| --- | --- | --- | --- |
| L | 0 | * | - |
| HL+ | 9.37(1) | * | - |
| H2L2+ | 18.56(1) | 0.14 | 6.7 |
| H3L3+ | 26.43(2) | 3.9 | 6.4 |
| H4L4+ | 34.02(1) | 100 | <3.2 |
| ZnH2L4+ | 23.91(1) | 38.61 | 6.4 |
| ZnHL3+ | 11.86(2) | * | - |
| ZnL2+ | 4.41(1) | * | - |
| Zn2L4+ | 6.43(1) | * | - |
| Zn2H-1L3+ | -0.21(1) | * | - |
| Zn2H-2L2+ | 0.42(1) | 51.28 | 7.0 |
| Zn2H-2L(OH)+ | -6.83(2) | 95.80 | 9.0 |
| Zn2H-2L(OH)2 | -17.48(1) | 95.79 | pH>12 |

Species marked * mean that the maximum concentration of according species in aqueous solution is less than 1 ppm.

**Supplement 3. W-x Tang *et al*.**


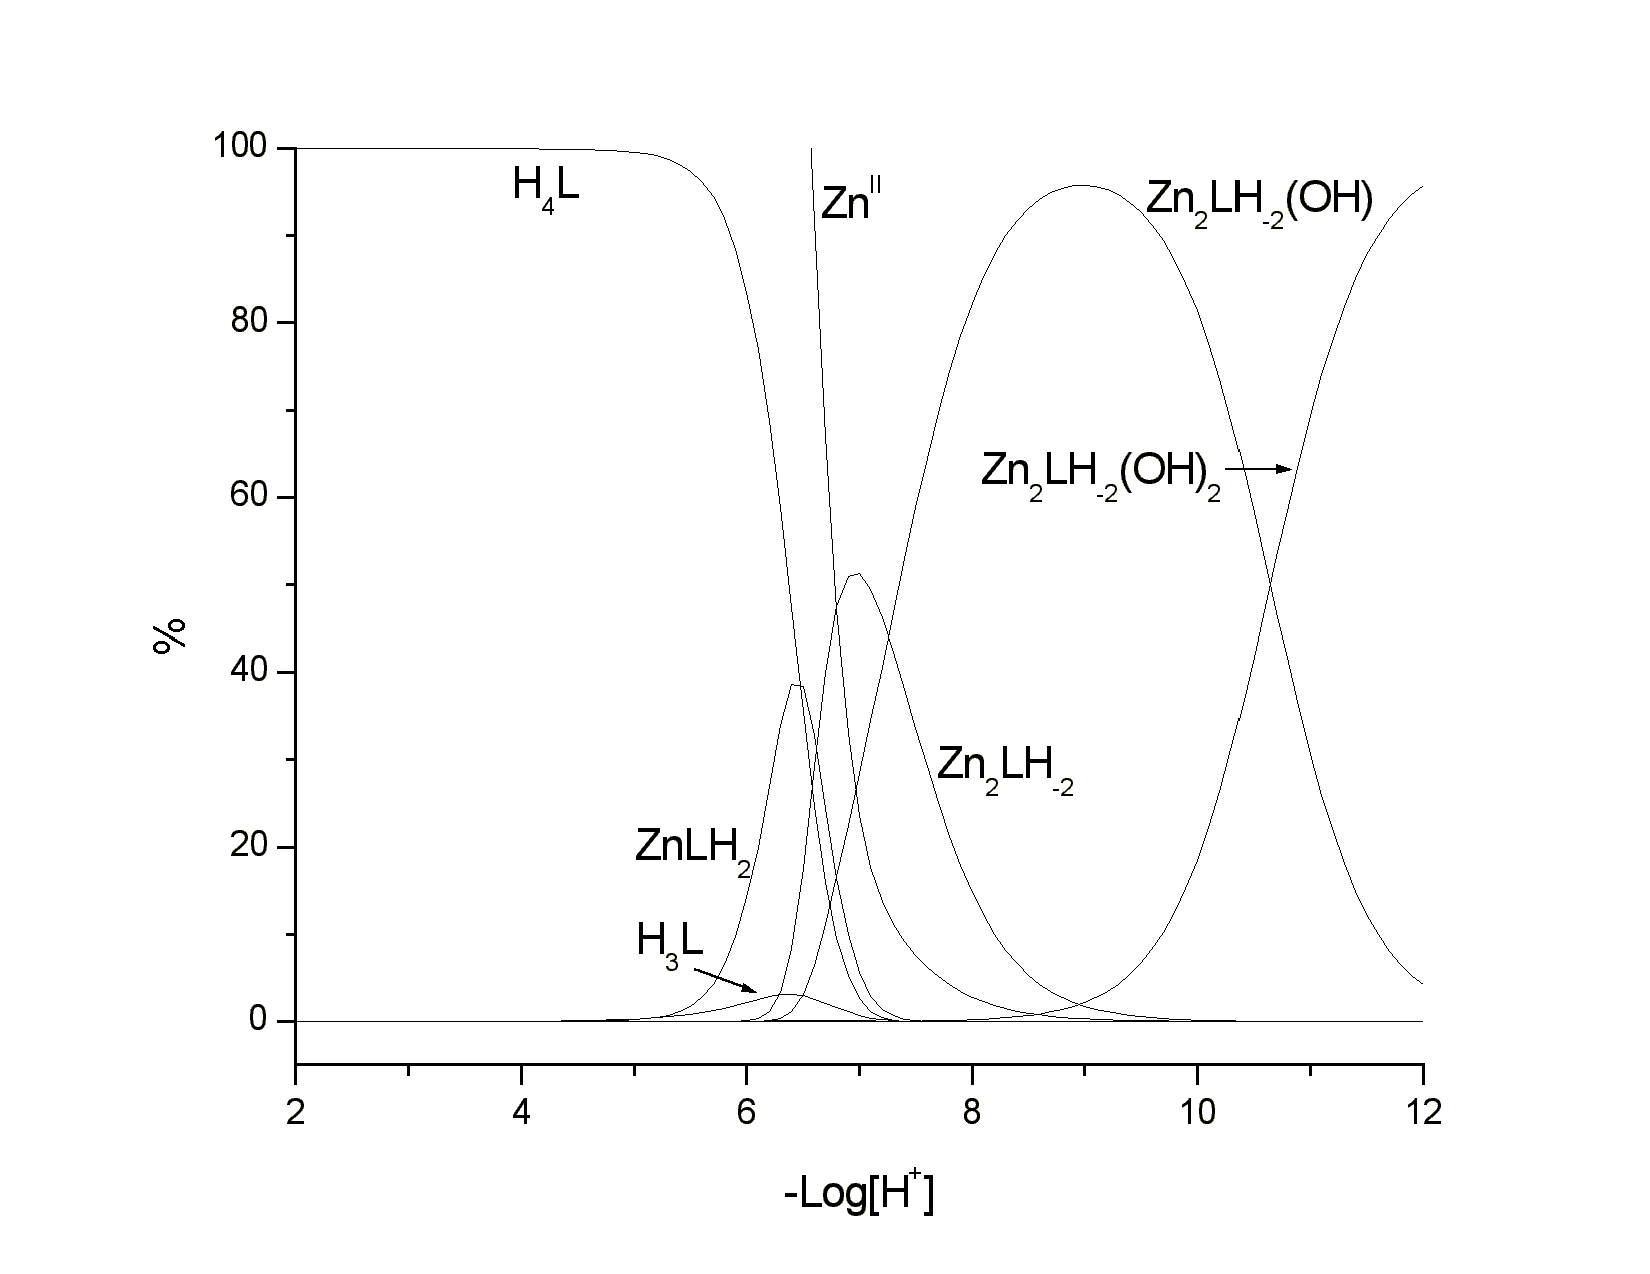
Species distribution graph as a function of pH for 2.0 mM L + 4.0 mM ZnCl2 + 12.0 mM HCl at 25 C and *I* = 0.1 (NaNO3).

**Supplement 4. W-x Tang *et al*.**


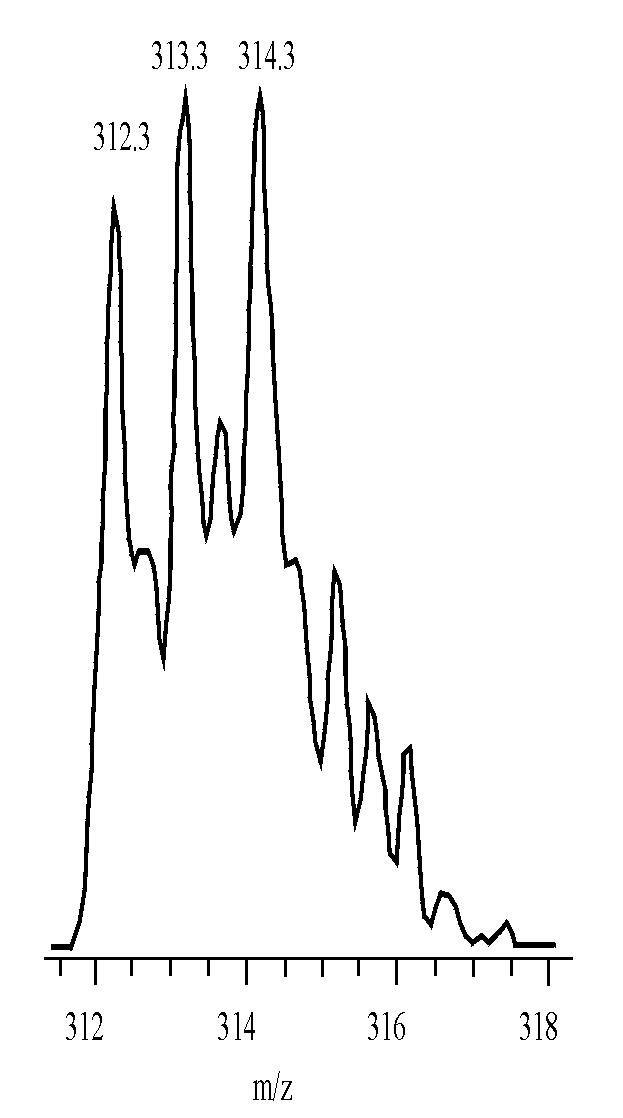

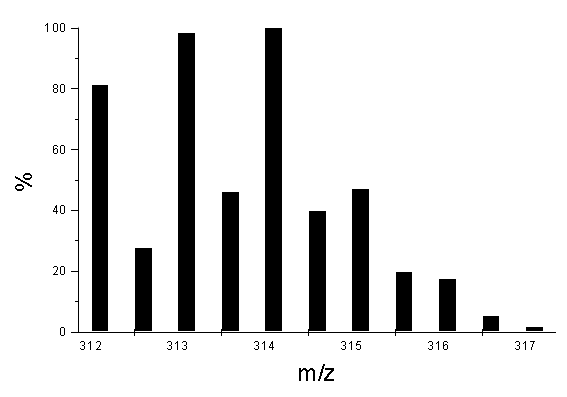
 (a) (b)

ES-MS spectrum of aqueous solution with ZnII and L in a ration of 2:1 at pH = 7.0. The peak m/z = 313.3 is assigned to [Zn2H-2L]2+, m/z = 250.3 is assigned to [H2L]2+, m/z = 499.5 is assigned to [HL]+. (a) observed (traces) isotopic distributions for the peaks at m/z = 313.3 for [Zn2H-2L]2+; (b) calculated (bars) isotopic distributions for the peaks at m/z = 313.3 for [Zn2H-2L]2+.
